1  
2  
3  
4  
5  
6  
7  
8  
9  
10  
11  
12  
13  
14  
15  
16  
17  
18  
19  
20  
21  
22  
23  
24  
25  
26  
27  
28  
29  
30  
31  
32  
33  
34  
35  
36  
37  
38  
39  
40  
41  
42  
43  
44  
45  
46  
47  
48  
49

***In vivo* cross-linking and transmembrane helix dynamics support a non-piston model of signalling within *E. coli* EnvZ**

Rahmi Yusuf<sup>a,1</sup>, Tuyết Linh Nguyễn<sup>a,1</sup>, Annika Heininger<sup>b</sup>, Robert J. Lawrence<sup>a</sup>, Benjamin A. Hall<sup>c\*</sup> and Roger R. Draheim<sup>a,d\*</sup>

<sup>a</sup>School of Pharmacy and Biomedical Sciences, University of Portsmouth, Portsmouth, PO1 2DT, England, UK; <sup>b</sup>Institute of Biochemistry, Biocenter, Goethe University Frankfurt, D-60438 Frankfurt, Germany; <sup>c</sup>MRC Cancer Unit, University of Cambridge, Cambridge, CB2 0XZ, England, UK; <sup>d</sup>Institute of Biological and Biomedical Science, University of Portsmouth, Portsmouth, PO1 2DT, England, UK

Running title: Non-piston transmembrane communication by EnvZ

<sup>1</sup>These authors contributed equally

\*To whom correspondence should be addressed (B. A. H. or R. R. D.):

MRC Cancer Unit  
University of Cambridge  
Hutchison / MRC Research Centre  
Box 197, Cambridge Medical Campus  
Cambridge  
CB2 0XZ  
United Kingdom  
tel: + 44 (0) 1223 763240  
fax: + 44 (0) 1223 763241

University of Portsmouth  
School of Pharmacy and Biomedical Sciences  
St. Michael's Building  
White Swan Road  
Portsmouth  
PO1 2DT  
United Kingdom  
tel: +44 (0)23 9284 2133  
fax: +44 (0)23 9284 3565

50 **Keywords**

51

52 porin balance / transmembrane communication / coarse-grained molecular dynamics / sulfhydryl-

53 reactivity / transmembrane helix dynamics

54

55 In gram-negative bacteria, porins span the outer membrane and control the influx of several  
56 prominent groups of antibiotics<sup>1,2</sup>. Thus, it should not be surprising that expression of these porins  
57 is often altered in clinical isolates that exhibit multidrug resistance (MDR)<sup>3-9</sup>. The major regulator  
58 of porin expression in *Escherichia coli* is EnvZ, a canonical sensor histidine kinase (SHK). It  
59 allosterically processes periplasmic interactions with MzrA and cytoplasmic osmosensing into a  
60 single unified change in the ratio of its kinase and phosphatase activities<sup>10-15</sup>. Unfortunately, the role  
61 of the transmembrane domain (TMD) in communicating these signals across the cellular membrane  
62 remains not well understood. Here, we employed *in vivo* sulfhydryl-reactivity to probe the  
63 dynamics of individual TM2 helices within the TMD and demonstrate that upon stimulus  
64 perception, EnvZ employs a non-piston-type mechanism of transmembrane communication. *In*  
65 *silico* coarse-grained molecular dynamics (CG-MD) simulations with EnvZ TM2 are in agreement  
66 with these *in vivo* results. We conclude by discussing these results within the context of allosteric  
67 processing by EnvZ and propose that these results can be used to predict and classify  
68 transmembrane communication by various SHKs.

69  
70 Most porins involved in antibiotic transport by gram-negative bacteria belong to the classical OmpF  
71 and OmpC families<sup>2</sup>. Transcription of these porins is governed by the intracellular concentration of  
72 phospho-OmpR (OmpR-P), which is controlled by EnvZ in response to changes in periplasmic  
73 interactions with MzrA and environmental osmolarity<sup>10-15</sup> (Figure S1A). At low intracellular levels  
74 of OmpR-P, transcription of *ompF* is upregulated, whereas at higher levels of OmpR-P,  
75 transcription of *ompF* is repressed and transcription of *ompC* is activated. This results in a  
76 predominance of OmpF at low osmolarity and OmpC at higher osmolarities or in the presence of  
77 MzrA (Figure S1B)<sup>16-18</sup>. Dramatic modification of porin balance, which has been observed within  
78 clinical isolates from patients undergoing antibiotic treatment, strongly suggests that the underlying  
79 mechanisms of porin regulation by EnvZ require further characterisation<sup>3-9</sup>. In addition, it was

80 recently shown that mutations in EnvZ within a porin-deficient (*ompC ompF*) *E. coli* strain also  
81 resulted in increased carbapenem resistance<sup>19</sup>. Thus, EnvZ plays a not well-understood role in  
82 mediating antibacterial resistance that warrants further elucidation.

83

84 Comparison of recently published *apo* and *holo* high-resolution (~1.9 Å) crystal structures of the *E.*  
85 *coli* nitrate sensor NarQ that contain the periplasmic, TM and HAMP domains reveal extensive  
86 structural rearrangements involving a piston-like motion of TM1 relative to TM2 of approximately  
87 2.5 Å. These displacements result in a lever-like rotation of individual HAMP domains upon  
88 binding of cognate ligand<sup>20</sup>. Based on these results, the authors posit that receptors containing a  
89 membrane-adjacent HAMP domain function by a piston-type displacement of TM helices while  
90 those that lack such domains transduce signal by rotation of TM helices. We previously postulated a  
91 related yet different categorisation of signalling mechanisms also based on the domain structure of  
92 bacterial receptors<sup>21</sup>. We proposed that receptors containing a periplasmic four-helix bundle  
93 transduce signal across the membrane by piston-type displacements and that the attached  
94 membrane-adjacent HAMP domains might possess one of a multitude of signalling mechanisms  
95 including a gearbox-type rotation<sup>22</sup>, a dynamic bundle<sup>23</sup> or potentially other mechanisms<sup>21</sup>.  
96 Differentiating between these classification systems will provide a theoretical framework for  
97 understanding domain-based intra-protein allosteric communication by bacterial receptors.

98

99 Here, we have analysed transmembrane signalling within EnvZ for several reasons. Firstly, because  
100 of its aforementioned importance in regulating bacterial porin expression. Understanding how EnvZ  
101 transduces signal would be a significant step toward direct manipulation of porin balance in  
102 bacterial cells exhibiting MDR. Secondly, it examines whether SHKs that possess membrane-  
103 adjacent HAMP domains function solely by piston-type displacements or whether other signalling  
104 mechanisms might be employed. The results here with EnvZ are compared with previous findings

105 from the aspartate chemoreceptor (Tar) and the recent NarQ structures<sup>20,24-26</sup>. These three are ideal  
106 candidates for comparison because they all possess a membrane-adjacent HAMP domain, however,  
107 while Tar and NarQ possess a periplasmic four-helix bundle, EnvZ possesses a periplasmic  
108 PDC/CACHE domain<sup>27,28</sup>.

109

### 110 *Mapping TM2 surfaces important for EnvZ signal output*

111

112 We previously created a Cys-less version of EnvZ from *E. coli* that had its sole Cys residue  
113 changed to an Ala residue (C277A). The Cys-less variant is expressed from pRD400, which results  
114 in the addition of a seven-residue linker (GGSSAAG) and a C-terminal V5 epitope  
115 (GKPIPPLLGLDST). We previously found that the Cys-less version of EnvZ had similar steady-  
116 state signal output and response to environmental osmolarity as the wild-type version of EnvZ  
117 making it suitable for comparisons of *in vivo* sulfhydryl-reactivity and signal output analysis. We  
118 initially determined that no major rearrangements occur along the TM1-TM1' interface upon  
119 stimulus perception<sup>29</sup>. As minimal change was observed along this helical interface in response to  
120 osmolarity, we continued by examining the TM2-TM2' interface. We began by determining which  
121 residues comprise TM2 by subjecting the full EnvZ sequence to DGpred<sup>30</sup> and TMHMM v2.0<sup>31</sup>,  
122 which suggested that Leu-160 to Ile-181 and Leu-160 to Ile-179 comprise TM2 respectively. Based  
123 on these analyses, we employed site-directed mutagenesis using the Cys-less variant as a template  
124 to create a library of single-Cys-containing EnvZ proteins that spanned from positions 156 to 184  
125 (Figure 1). We observed that nearly the entire library was expressed within EPB30/pRD400 cells  
126 grown under the low- or high-osmolarity regime. Variants possessing a Cys at position 156 showed  
127 low levels of expression when grown under the low-osmolarity (0% sucrose) regime. However,  
128 when grown under the high-osmolarity regime, no variants showed reduced expression level  
129 (Figure S2). These results indicate that the library is suitable for further *in vivo* experimentation.

130

131 We began by expressing each of the single-Cys-containing variants in EPB30/pRD400 cells, which  
132 allowed us to measure CFP fluorescence, YFP fluorescence, and to calculate the CFP/YFP ratio that  
133 estimates steady-state EnvZ signal output (Figure S1B). Cells expressing the Cys-less C277A were  
134 used as a baseline comparison (Figure S3). When EPB30/pRD400 cells are grown under the low-  
135 osmolarity regime, a shift in signalling output toward the “on” or kinase-dominant state results in  
136 increased CFP fluorescence, reduced YFP fluorescence and an increase in the overall CFP/YFP  
137 ratio, while a shift toward the “off” or phosphatase-dominant state appears as decreased CFP,  
138 increased YFP and a decrease in CFP/YFP ratio (Figures 2 and S4).

139

140 Several trends were observed during analysis of the library of Cys-containing EnvZ receptors.  
141 When EPB30/pRD400 cells were grown under the low-osmolarity regime, EnvZ was less tolerant  
142 of Cys substitutions at the N- and C-terminal regions of the library. At the N-terminus, signal output  
143 from receptors containing a Cys at positions 156, 162 and 163 were very elevated, exhibiting  
144 greater than a 5-fold increase in CFP/YFP, while receptors possessing a Cys in the C-terminus at  
145 positions 179, 181, 182 and 184 were elevated, possessing over a 2-fold increase in CFP/YFP.  
146 These boundary regions appear to flank a core of alternating increases and decreases in EnvZ signal  
147 output, as observed between residue positions 165 and 180, suggesting that multiple tightly packed  
148 EnvZ helices exist within the hydrophobic core of the inner membrane (Figures 2A and 2B). When  
149 grown under the high-osmolarity regime, a pattern appeared where Cys substitutions resulted in  
150 significant decreases in signal output (Figure 2C). Of the 29 mutants analysed, 13 supported less  
151 than 75% of the normal wild-type signal output.

152

153 Perhaps most striking is the inverse effect on EnvZ signal output of the Cys substitutions that flank  
154 the hydrophobic core of TM2. For these residues, when grown under the low-osmolarity regime, the

155 presence of a Cys residue resulted in an increase in signal output of more than 25%, i.e. shifted  
156 toward the on or kinase-dominant state (red dots in Figure 2A) and a reduction in signal output of  
157 more than 25%, i.e. shifted toward the off or phosphate-dominant state, when grown under the high-  
158 osmolarity regime (blue dots in Figure 2C). These flipped positions reside at the N- and C-terminal  
159 ends of the region we examined and outside of the proposed hydrophobic TMD core (Figure 2).  
160 Within the hydrophobic core, Cys substitutions show similar changes when cells are grown under  
161 the low- and high-osmolality regimes. These results suggest that the flanking regions are not simply  
162 rigid structural conduits for signal transduction but may have higher-order roles in signal  
163 transduction, such as MzrA interaction or functioning as a control cable at the N- and C-terminal  
164 regions respectively<sup>14,15,23,32-34</sup>.

165

#### 166 *Identifying surfaces involved in TM2-TM2' interactions*

167

168 Sulfhydryl-reactivity experimentation is well-characterised and has been employed on many soluble  
169 and membrane-spanning proteins and higher-order complexes<sup>35</sup>. The *in vivo* nature of this assay  
170 facilitated mapping of the TM2-TM2' interface under different osmotic conditions, which is an  
171 important first step toward understanding how EnvZ processes allosteric inputs from periplasmic  
172 MzrA binding and cytoplasmic osmosensing into a single uniform modulation of bacterial porin  
173 balance (Figures 1 and S1). In a similar manner to mapping TM1-TM1' interactions<sup>29</sup>, Cys-  
174 containing EnvZ variants were expressed in EPB30/pRD400 cells and upon entering the early  
175 exponential phase ( $OD_{600nm} \approx 0.25$ ) they were subjected to 250  $\mu$ M molecular iodine for 10 minutes  
176 analysed by non-reducing SDS-PAGE and immunoblotting (Figure S5).

177

178 We observed three distinct regions within TM2. The N-terminal region (region I in Figure 3),  
179 comprised of residues 156 to 163, exhibited significant cross-linking under the low-osmolarity

180 regime (0% sucrose) and almost no crosslinking under the high-osmolarity (15% sucrose) regime.  
181 The second region (II) consisting of positions 164 to 179, demonstrated altering low and high levels  
182 of disulphide-formation consistent the crossing of TM2 and TM2' within the hydrophobic core of  
183 the TMD. The final region (III), from residues 180 to 184, shows no crosslinking (Figure 3). It  
184 should be noted that this significant difference at the periplasmic end of the TMD between cells  
185 grown under the low- and high-osmolarity regime was not observed during similar analyses of  
186 TM1<sup>29</sup>.

187

### 188 *Molecular simulations of the wild-type and aromatically tuned variants of EnvZ TM2*

189

190 The piston-type model of transmembrane communication is founded upon the central tenant that the  
191 vertical position of TM2 relative to the lipid bilayer changes upon stimulus perception. Previous  
192 work with TM2 of Tar demonstrates that repositioning the aromatic residues at the cytoplasmic end  
193 of TM2, known as aromatic tuning<sup>36</sup>, repositions the helix within a biological membrane<sup>37</sup> and that  
194 this repositioning causes an incremental change in signal output<sup>36</sup>. These results served as an  
195 experimental framework to optimise SIDEKICK software capable of high-throughput parallelised  
196 coarse-grained molecular dynamics (CG-MD) simulations, which demonstrated that aromatic  
197 tuning repositioned the TM2 helix *in silico* in a manner consistent with both the *in vivo* results and a  
198 piston-type mechanism of transmembrane communication<sup>38</sup>.

199

200 Based on these extensive results and the recent suggestion that mechanisms employed by SHKs  
201 during TM communication correlate with the presence of a membrane-adjacent HAMP domain, we  
202 performed analogous *in silico* experimentation with EnvZ, which possesses a membrane-adjacent  
203 HAMP domain but substitutes a periplasmic PDC/CACHE domain for the four-helix bundle present  
204 in Tar and NarQ<sup>20,27,28,39</sup>. We previously performed aromatic tuning with TM2 of EnvZ and found



205 that signal output was not correlated with the absolute vertical position of the aromatic residues as  
206 was shown for Tar TM2, which suggested that EnvZ does not transduce signal output across the  
207 membrane by a piston-type displacement<sup>40</sup>.

208

209 To interpret the results of our GC-MD analysis, we categorised the signal output of these  
210 aromatically tuned EnvZ variants<sup>40</sup>. For several two-component signalling circuits, including the  
211 EnvZ/OmpR, PhoQ/PhoP and CpxA/CpxR circuits, the steady-state output of the signalling circuits  
212 has been shown to be independent of the level of SHK present<sup>40-43</sup>. However, in circuits containing  
213 the tuned variants of EnvZ, a different relationship between steady-state signal output and receptor  
214 level was observed, suggesting that the ratio of kinase to phosphatase activities was different within  
215 each receptor and always different than wild-type EnvZ<sup>40</sup>. Based on this analysis, we found that the  
216 WLF-1 variant possessed the highest signal output while the WLF-5, WLF-4 and WLF-3 variants  
217 possessed only slightly higher activity than wild-type EnvZ, which maintained receptor-  
218 concentration dependent robustness unlike the tuned variants. WLF-2 and WLF+1 were found to  
219 possess reduced signal output, while WLF+2 possessed the lowest overall signal output. These  
220 differences were previously quantified by analysing the slope of the change in CFP/YFP against the  
221 amount of receptor present and are visually represented in Figure S6<sup>40</sup>. These classifications are  
222 employed during interpretation of the CG-MD results in Figure 4.

223

224 Based on these previous results and the absence of asymmetric TM2 displacement observed within  
225 the *in vivo* sulfhydryl-reactivity assay (Figure 3), we assessed whether molecular simulations would  
226 lend credibility to a non-piston type of transmembrane communication employed by EnvZ. We  
227 began by designing tuned TM2 sequences to subject to GC-MD simulations that matched those  
228 previously used during the aromatic tuning experimentation (Figure 4A). Unlike analogous  
229 experimentation with TM2 of Tar, no trend in helix displacement was observed (Figure 4B, Table

230 S1). This indicates that the mutations do not in isolation move the helix up and down in the  
231 membrane and would appear to rule out a pure piston motion as previously observed in Tar<sup>38</sup>.

232

233 An alternative mechanism for signal transduction is to induce a tilt in the helix relative to the  
234 bilayer normal. This was originally proposed in Tar on the basis of crystallographic analysis of the  
235 receptor domain<sup>44</sup>, and led to the proposal of a “swinging piston” where both displacement and tilt  
236 contributed to signal transduction. In addition, this would be consistent with a scissor-type model of  
237 TM communication proposed to be utilised by PhoQ<sup>45,46</sup>, which possesses a periplasmic  
238 PDC/CACHE domain<sup>47</sup>. In testing the tuned EnvZ TM2 helices, a change in the extent of tilting  
239 was observed during the CG-MD simulations (Figure 4C, Table S2). It was found that a reduction  
240 in tilt, to a mean tilt of between 22 and 24 degrees, compared to the wild-type TM2 sequence with a  
241 tilt of approximately 26 degrees correlated with a decreased signal output (phosphatase-biased, dark  
242 blue). Interestingly, an increase in tilt to more than 29 degrees correlated with extremely biased  
243 signal output, *i.e.* highly kinase-dominant (WLF-1, pink) and highly phosphatase-dominant  
244 (WLF+2, bright blue). Taken together, these results demonstrate that tilt, rather than vertical  
245 displacement, does correlate with altered signal output from EnvZ.

246

247 Finally, a rotational/gearbox model of TMD-HAMP communication has also been proposed for  
248 EnvZ<sup>22,48</sup>. Central to this model is that interconversion between the kinase-dominant and  
249 phosphatase-dominant signalling states can be accomplished by rotation of the individual HAMP  
250 helices in unison by 26 degrees. Within our simulations, we observed some consistency with the  
251 gearbox model of HAMP signalling, especially when the WLF-1 helix possessed a mean azimuthal  
252 rotation that is 25 degrees different than wild-type EnvZ (pink in Figure 4D). The full-length WLF-  
253 1 receptor was determined to be the most highly kinase-biased tuned receptor we studied. The TM  
254 helix from the most phosphatase-biased receptor (WLF+2) possessed a mean azimuthal rotation of

255 an additional 15 degrees. For the simulations involving other helices, it was not possible to  
256 differentiate them into separate classes.

257

258 Here, our *in vivo* analysis demonstrated that only the periplasmic end of EnvZ TM2 undergoes a  
259 conformational transition upon stimulus perception suggesting that the asymmetric piston-type  
260 displacement employed by Tar is not used by EnvZ. Previously, a linear correlation was observed  
261 between the position of the aromatic residue in Tar TM2, the position of the helices *in vitro* and *in*  
262 *silico* and the signal output from each Tar receptor<sup>36,37,40,49</sup>. Here, *in silico* analysis of EnvZ TM2  
263 demonstrates that such a linear correlation is absent suggesting that EnvZ functions by a non-piston  
264 mechanism in which both tilting and azimuthal rotation play a substantial role in modulation of  
265 signal output (Figure 4).

266

267 *Correlations between domain composition and mechanisms of signal transduction*

268

269 The authors of the recent NarQ structures posit that the presence or absence of the membrane-  
270 adjacent HAMP domain may be the difference between receptors employing piston-type  
271 mechanisms of transmembrane communication as compared to other signalling mechanisms<sup>20</sup>.  
272 However, differences employed during transmembrane communication by the Tar and EnvZ TMDs  
273 observed here and previously strongly suggest that Tar and EnvZ possess different mechanisms of  
274 TM communication. Our previous work analysed AS1 helices from *E. coli* NarX, *E. coli* Tar, *E.*  
275 *coli* EnvZ and Af1503, the HAMP domain resulting in the initial high-resolution structure<sup>22</sup>, and  
276 found that the Tar and NarX AS1 helices possess similar properties, which AS1 helices from both  
277 EnvZ and Af1503 lack. Recent comparisons of the *apo* and ligand-bound structures of the  
278 combined periplasmic-TM-HAMP domain from *E. coli* NarQ demonstrate that binding of ligand  
279 results in symmetrical displacements of TM1 relative to TM2 of approximately 2.5 Å.<sup>20</sup> These

280 results are similar to Tar, which functions by asymmetrical TM2 displacement also possesses a  
281 periplasmic four-helix-bundle<sup>24-26,39</sup>. Thus, we conclude that *E. coli* EnvZ functions by a non-piston  
282 mechanism of transmembrane communication that is different than Tar, NarX and NarQ, which  
283 communicate across the membrane by piston-type displacements. Furthermore, we propose that the  
284 TM signalling mechanisms can be predicted and assigned based upon the domain(s) present in the  
285 periplasmic region of a bacterial TM-spanning receptor.

286

## 287 **Methods**

288

### 289 *Bacterial strains and plasmids*

290

291 *E. coli* strains DH10B (New England Biolabs) or MC1061<sup>50</sup> were used for DNA manipulations,  
292 while strain K-12 MG1655<sup>51</sup> served a non-fluorescent strain that was used to control for light  
293 scattering and cellular autofluorescence. *E. coli* strains MDG147 [MG1655  $\Phi(ompF^+ -yfp^+)$   
294  $\Phi(ompC^+ -cfp^+)$ ]<sup>52</sup> and EPB30 (MDG147 *envZ::kan*)<sup>43</sup> were employed for analysis of EnvZ signal  
295 output. Plasmid pRD400<sup>40</sup> retains the IPTG-based induction of EnvZ from plasmid pEnvZ<sup>53</sup> while  
296 adding a seven-residue linker (GGSSAAG)<sup>54</sup> and a C-terminal V5 epitope tag  
297 (GKPIPPLLGLDST)<sup>55</sup>. As the C-terminus of bacterial receptors can be sensitive to the presence  
298 of an epitope tag, we previously ensured that the addition of a V5-epitope tag did not alter the  
299 signalling properties of EnvZ<sup>40,56</sup>. Plasmid pEB5<sup>41</sup> was employed as an empty control vector.

300

### 301 *Selection of residues comprising TM2 of EnvZ*

302

303 The primary sequence of EnvZ from *E. coli* K-12 MG1655 was subjected to DGpred using a  
304 minimal window of 9 residues and a maximal window of 40 residues<sup>30</sup>. Alternatively, a software

305 package that identifies TM helices with a Markov model (TMHMM v2.0)<sup>31</sup> was also employed.  
306 These software packages suggested that Leu-160 to Ile-181 and Leu-160 to Ile-179 comprise TM2  
307 respectively. Based on these results and to maximize the probability of including all residues within  
308 TM2, we targeted all residues between positions 156 to 184 for the creation of a library of single-  
309 Cys-containing EnvZ receptors.

310

### 311 *Analysis of EnvZ signal output in vivo*

312

313 Bacterial cultures were grown as described previously<sup>57</sup> with minor modification. MDG147 or  
314 EPB30 cells were transformed with pRD400 expressing one of the single-Cys-containing EnvZ  
315 receptors or pEB5 (empty). Fresh colonies were used to inoculate 2-ml overnight cultures of  
316 minimal medium A<sup>58</sup> supplemented with 0.2% glucose. Ampicillin, sucrose and IPTG were added  
317 as appropriate. Cells were grown overnight at 37 °C and diluted at least 1:1000 into 7 ml of fresh  
318 medium. Upon reaching an OD<sub>600nm</sub> ≈ 0.3, chloramphenicol was added to a final concentration of  
319 170 µg/ml. Fluorescent analysis was immediately conducted with 2 ml of culture and a Varian Cary  
320 Eclipse (Palo Alto, CA). CFP fluorescence was measured using an excitation wavelength of 434 nm  
321 and an emission wavelength of 477 nm, while YFP fluorescence was measured using an excitation  
322 wavelength of 505 nm and an emission wavelength of 527 nm. These values were corrected for cell  
323 density and for light scattering/cellular autofluorescence by subtracting the CFP and YFP  
324 fluorescence intensities determined for MG1655/pEB5 cells.

325

### 326 *Analysis of sulfhydryl-reactivity in vivo*

327

328 Cells were grown as described above with minor changes. Upon reaching an OD<sub>600nm</sub> ~ 0.3, cells  
329 were subjected to between 250 µM molecular iodine for 10 min while incubating at 37 °C. The

330 reaction was terminated with 8 mM N-ethylmaleimide (NEM) and 10 mM EDTA. Cells were  
331 harvested by centrifugation and resuspended in standard 6X non-reducing SDS-PAGE buffer  
332 supplemented with 12.5 mM NEM. Cell pellets were analysed on 10% SDS/acrylamide gels.  
333 Standard buffers and conditions were used for electrophoresis, immunoblotting and detection with  
334 enhanced chemiluminescence<sup>59</sup>. Anti-V5 (Invitrogen) was the primary antibody and peroxidase-  
335 conjugated anti-mouse IgG (Sigma) was the secondary antibody. Digitized images were acquired  
336 with a ChemiDoc MP workstation (Bio-RAD), analysed with ImageJ v1.49<sup>60</sup> and quantified with  
337 QtiPlot v0.9.8.10.

338

### 339 *CG-MD simulations with SIDEKICK*

340

341 As previously described<sup>38</sup>, coarse-grained molecular dynamics (CG-MD) simulations were  
342 performed using the MARTINI forcefield with an approximately 4:1 mapping of non-H atoms to  
343 CG particles. Lennard-Jones interactions between 4 classes of particles: polar (P), charged (Q),  
344 mixed polar/apolar (N) and hydrophobic apolar (C) were used to treat interparticle interactions.  
345 Within MARTINI, P and C particle types were subdivided to reflect varying degrees of polarity.  
346 Short range electrostatic interactions were treated Coulombically, shifted to zero between 0 and 12  
347 Å. Lennard-Jones interactions were shifted to zero between 9 and 12 Å.  $\alpha$ -helix integrity was  
348 maintained via dihedral restraints. Peptide termini were treated as uncharged. Simulations were  
349 performed using Gromacs 3<sup>61</sup>. Temperature was coupled using a Berendsen thermostat at 323 K  
350 ( $\tau_T=1$  ps), and pressure was coupled semi-isotropically (across XY/Z) at 1 bar  
351 (compressibility= $3\times 10^{-5}$  bar<sup>-1</sup>,  $\tau_P=10$  ps). The initial simulation timestep was 20 fs. Initial models  
352 of the TM  $\alpha$ -helices were generated as ideal, atomistically detailed  $\alpha$ -helices using standard  
353 backbone angles and side-chain conformers. These were then converted to coarse-grained as

354 described previously<sup>38</sup>. Around 128 DPPC molecules were used in each simulation along with  
355 around 3000 CG water particles, giving a final system size of  $\sim 65 \times 65 \times 13$  Å.

356

### 357 **Author contributions**

358

359 R. Y., T. L. N., B. A. H. and R. R. D. conceived and designed the experiments. R. Y., T. L. N., A. H.  
360 and R. J. L. performed the experiments. R. Y., A. H., T. L. N., R. J. L., B. A. H. and R. R. D.  
361 analysed the data. R. Y., T. L. N., B. A. H. and R. R. D. wrote the manuscript. All authors read and  
362 approved the final manuscript.

363

### 364 **Acknowledgments**

365

366 R. Y. was generously supported by the Indonesia Endowment Fund for Education, Ministry of  
367 Finance (S-4833/LPDP.3/2015). T. L. N. was supported by a grant from the Erasmus+ programme.  
368 R. R. D. was supported with start-up funding from the Faculty of Science and from the Institute of  
369 Biological and Biomedical Science (IBBS) at the University of Portsmouth. B. A. H. was supported  
370 by The Royal Society (UF130039).

371

### 372 **Competing interests**

373

374 The authors declare no competing financial interests.

375

### 376 **Figure legends**

377

378 Figure 1. EnvZ functions as a homodimer with a cytoplasmic N-terminus, the first transmembrane  
379 helix (TM1, white), a large periplasmic domain (sensor, white), the second transmembrane helix  
380 (TM2, red), a membrane-adjacent HAMP domain (grey) and the cytoplasmic domains responsible  
381 for dimerization and histidylphosphotransfer (DHp, black) and catalytic ATPase activity (CA,  
382 black). The position of the original Cys-277 residue that was mutated to Ala to produce the Cys-less  
383 EnvZ is provided. The residues subjected to Cys substitution and their position in the primary  
384 sequence is provided. Signal output from each single-Cys-containing variant is compared to the  
385 Cys-less (C277A) variant: less than 50% of Cys-less (light blue), between 50% and 75% of Cys-  
386 less (dark blue), between 75% and 125% of Cys-less (grey), between 125% and 200% (dark red)  
387 and greater than 200% (light red). Residue positions exhibited flipped signal output are indicated  
388 with a plus. The extent of sulphhydryl-reactivity is also presented in five categories based on dimer-  
389 to-monomer ratio: no dimer present (white), less than 0.05 (light grey), between 0.05 and 0.2  
390 (medium grey), between 0.2 and 0.5 (dark grey) and greater than 0.5 (red). Positions that exhibit a  
391 significant change in cross-linking between the low- and high-osmolarity regimes are indicated with  
392 a plus.

393

394 Figure 2. Signal output from the library of single-Cys EnvZ variants. (A) CFP/YFP from  
395 EPB30/pRD400 cells expressing one of single-Cys variants grown under the low-osmolarity (0%  
396 sucrose) regime. On the right axis, these CFP/YFP ratios are compared to the Cys-less (C277A)  
397 variant. (B) Magnified version of panel A in order to emphasise the region up to a 2-fold increase in  
398 CFP/YFP. (C) CFP/YFP from EPB30/pRD400 cells expressing one of the single-Cys variants  
399 grown under the high-osmolarity (15% sucrose) regime. On the right axis, these CFP/YFP ratios are  
400 compared to the Cys-less (C277A) variant. The flipped mutants are highlighted with a red dot in  
401 panel A (increased signal output) and a blue dot in panel C (decreased signal output). The shaded  
402 areas represent the mean signal output from the Cys-less variant of EnvZ with a range of one



403 standard error of mean. These values are provided to aid in comparison. Error bars represent  
404 standard deviation of the mean with a sample size of  $n \geq 3$ .

405 Figure 3. Extent of sulfhydryl-reactivity for each single-Cys-containing EnvZ variant.  
406 EPB30/pRD400 cells were grown under the low- (empty circles, 0% sucrose) or high-osmolarity  
407 (filled circles, 15% sucrose) regimes and subjected to 250  $\mu$ M molecular iodine for 10 minutes  
408 when their OD<sub>600nm</sub> reached approximately 0.25. As shown in Figure S5, this allowed us to  
409 determine the dimer/monomer ratio represented on the Y-axis. Three distinct regions, denoted I, II  
410 and III were observed and are described in the text. Error bars represent the standard error of the  
411 mean with a sample size of  $n \geq 3$ .

412

413 Figure 4. Aromatic tuning and signal output from EnvZ. (A) When aromatic tuning was performed  
414 in EnvZ, a Trp-Leu-Phe triplet (red) was repositioned within the C-terminal region of TM2. (B)  
415 Helix displacements, (C) tilt distributions and (D) azimuthal rotational distributions of the  
416 aromatically tuned EnvZ TM2 helices. Histograms are shown for all time points of all membranes  
417 of each ensemble. Aromatically tuned mutants have been classified based on their signal output into  
418 five categories: highly kinase biased (WLF-1; pink), moderately kinase biased (WLF-5, WLF-4,  
419 WLF-3; red), balanced (wild-type; black), moderately phosphatase biased (WLF-2, WLF+1, dark  
420 blue) and highly phosphatase biased (WLF+2, light blue).

421

## 422 **References**

423

- 424 1 Delcour, A. H. Solute uptake through general porins. *Frontiers in bioscience : a journal and*  
425 *virtual library* **8**, d1055-1071, (2003).
- 426 2 Nikaido, H. Molecular basis of bacterial outer membrane permeability revisited.  
427 *Microbiology and molecular biology reviews : MMBR* **67**, 593-656, (2003).
- 428 3 Elliott, E. et al. In vivo development of ertapenem resistance in a patient with pneumonia  
429 caused by *Klebsiella pneumoniae* with an extended-spectrum beta-lactamase. *Clinical*

- 430 *infectious diseases : an official publication of the Infectious Diseases Society of America* **42**,  
431 e95-98, (2006).
- 432 4 Hernandez-Alles, S. et al. Relationship between outer membrane alterations and  
433 susceptibility to antimicrobial agents in isogenic strains of *Klebsiella pneumoniae*. *The*  
434 *Journal of antimicrobial chemotherapy* **46**, 273-277, (2000).
- 435 5 Jacoby, G. A., Mills, D. M. & Chow, N. Role of beta-lactamases and porins in resistance to  
436 ertapenem and other beta-lactams in *Klebsiella pneumoniae*. *Antimicrob. Agents*  
437 *Chemother.* **48**, 3203-3206, (2004).
- 438 6 Kaczmarek, F. M., Dib-Hajj, F., Shang, W. & Gootz, T. D. High-level carbapenem  
439 resistance in a *Klebsiella pneumoniae* clinical isolate is due to the combination of bla(CTX-  
440 1) beta-lactamase production, porin OmpK35/36 insertional inactivation, and down-  
441 regulation of the phosphate transport porin phoE. *Antimicrob. Agents Chemother.* **50**, 3396-  
442 3406, (2006).
- 443 7 Loli, A. et al. Sources of diversity of carbapenem resistance levels in *Klebsiella pneumoniae*  
444 carrying blaVIM-1. *The Journal of antimicrobial chemotherapy* **58**, 669-672, (2006).
- 445 8 Martinez-Martinez, L. et al. Activities of imipenem and cephalosporins against clonally  
446 related strains of *Escherichia coli* hyperproducing chromosomal beta-lactamase and  
447 showing altered porin profiles. *Antimicrob. Agents Chemother.* **44**, 2534-2536, (2000).
- 448 9 Mena, A. et al. Characterization of a large outbreak by CTX-M-1-producing *Klebsiella*  
449 *pneumoniae* and mechanisms leading to in vivo carbapenem resistance development. *J Clin*  
450 *Microbiol* **44**, 2831-2837, (2006).
- 451 10 Egger, L. A. & Inouye, M. Purification and characterization of the periplasmic domain of  
452 EnvZ osmosensor in *Escherichia coli*. *Biochem. Biophys. Res. Commun.* **231**, 68-72, (1997).
- 453 11 Forst, S. A. & Roberts, D. L. Signal transduction by the EnvZ-OmpR phosphotransfer  
454 system in bacteria. *Research in microbiology* **145**, 363-373, (1994).
- 455 12 Mizuno, T. His-Asp phosphotransfer signal transduction. *J Biochem* **123**, 555-563, (1998).
- 456 13 Hoch, J. A. & Silhavy, T. J. (American Society of Microbiology Press, Washington, DC,  
457 USA, 1995).
- 458 14 Gerken, H., Charlson, E. S., Cicirelli, E. M., Kenney, L. J. & Misra, R. MzrA: a novel  
459 modulator of the EnvZ/OmpR two-component regulon. *Mol Microbiol* **72**, 1408-1422,  
460 (2009).
- 461 15 Gerken, H. & Misra, R. MzrA-EnvZ interactions in the periplasm influence the EnvZ/OmpR  
462 two-component regulon. *J Bacteriol* **192**, 6271-6278, (2010).
- 463 16 Forst, S. A., Delgado, J. & Inouye, M. DNA-binding properties of the transcription activator  
464 (OmpR) for the upstream sequences of ompF in *Escherichia coli* are altered by envZ  
465 mutations and medium osmolarity. *J Bacteriol* **171**, 2949-2955, (1989).
- 466 17 Lan, C. Y. & Igo, M. M. Differential expression of the OmpF and OmpC porin proteins in  
467 *Escherichia coli* K-12 depends upon the level of active OmpR. *J Bacteriol* **180**, 171-174,  
468 (1998).
- 469 18 Russo, F. D. & Silhavy, T. J. EnvZ controls the concentration of phosphorylated OmpR to  
470 mediate osmoregulation of the porin genes. *J Mol Biol* **222**, 567-580, (1991).
- 471 19 Adler, M., Anjum, M., Andersson, D. I. & Sandegren, L. Combinations of mutations in envZ,  
472 ftsI, mrdA, acrB and acrR can cause high-level carbapenem resistance in *Escherichia coli*.  
473 *The Journal of antimicrobial chemotherapy* **71**, 1188-1198, (2016).
- 474 20 Gushchin, I. et al. Mechanism of transmembrane signaling by sensor histidine kinases.  
475 *Science*, (2017).
- 476 21 Unnerstale, S., Maler, L. & Draheim, R. R. Structural characterization of AS1-membrane  
477 interactions from a subset of HAMP domains. *Biochim Biophys Acta* **1808**, 2403-2412,  
478 (2011).

- 479 22 Hulko, M. et al. The HAMP domain structure implies helix rotation in transmembrane  
480 signaling. *Cell* **126**, 929-940, (2006).
- 481 23 Zhou, Q., Ames, P. & Parkinson, J. S. Mutational analyses of HAMP helices suggest a  
482 dynamic bundle model of input-output signalling in chemoreceptors. *Mol Microbiol* **73**,  
483 801-814, (2009).
- 484 24 Falke, J. J. & Hazelbauer, G. L. Transmembrane signaling in bacterial chemoreceptors.  
485 *Trends in biochemical sciences* **26**, 257-265, (2001).
- 486 25 Hazelbauer, G. L., Falke, J. J. & Parkinson, J. S. Bacterial chemoreceptors: high-  
487 performance signaling in networked arrays. *Trends in biochemical sciences* **33**, 9-19,  
488 (2008).
- 489 26 Parkinson, J. S., Hazelbauer, G. L. & Falke, J. J. Signaling and sensory adaptation in  
490 *Escherichia coli* chemoreceptors: 2015 update. *Trends in microbiology* **23**, 257-266, (2015).
- 491 27 Hwang, E. et al. Crystal structure of the EnvZ periplasmic domain with CHAPS. *FEBS Lett*  
492 **591**, 1419-1428, (2017).
- 493 28 Upadhyay, A. A., Fleetwood, A. D., Adebali, O., Finn, R. D. & Zhulin, I. B. Cache Domains  
494 That are Homologous to, but Different from PAS Domains Comprise the Largest  
495 Superfamily of Extracellular Sensors in Prokaryotes. *PLoS computational biology* **12**,  
496 e1004862, (2016).
- 497 29 Heining, A., Yusuf, R., Lawrence, R. & Draheim, R. R. Identification of transmembrane  
498 helix 1 (TMI) surfaces important for EnvZ dimerisation and signal output. *Biochim.*  
499 *Biophys. Acta* **1858**, 1868-1875, (2016).
- 500 30 Hessa, T. et al. Molecular code for transmembrane-helix recognition by the SecE1  
501 translocon. *Nature* **450**, 1026-1030, (2007).
- 502 31 Krogh, A., Larsson, B., von Heijne, G. & Sonnhammer, E. L. Predicting transmembrane  
503 protein topology with a hidden Markov model: application to complete genomes. *J Mol Biol*  
504 **305**, 567-580, (2001).
- 505 32 Adase, C. A., Draheim, R. R. & Manson, M. D. The residue composition of the aromatic  
506 anchor of the second transmembrane helix determines the signaling properties of the  
507 aspartate/maltose chemoreceptor Tar of *Escherichia coli*. *Biochemistry* **51**, 1925-1932,  
508 (2012).
- 509 33 Adase, C. A., Draheim, R. R., Rueda, G., Desai, R. & Manson, M. D. Residues at the  
510 cytoplasmic end of transmembrane helix 2 determine the signal output of the TarEc  
511 chemoreceptor. *Biochemistry* **52**, 2729-2738, (2013).
- 512 34 Wright, G. A., Crowder, R. L., Draheim, R. R. & Manson, M. D. Mutational analysis of the  
513 transmembrane helix 2-HAMP domain connection in the *Escherichia coli* aspartate  
514 chemoreceptor tar. *J Bacteriol* **193**, 82-90, (2011).
- 515 35 Bass, R. B., Butler, S. L., Chervitz, S. A., Gloor, S. L. & Falke, J. J. Use of site-directed  
516 cysteine and disulfide chemistry to probe protein structure and dynamics: applications to  
517 soluble and transmembrane receptors of bacterial chemotaxis. *Methods in enzymology* **423**,  
518 25-51, (2007).
- 519 36 Draheim, R. R., Bormans, A. F., Lai, R. Z. & Manson, M. D. Tuning a bacterial  
520 chemoreceptor with protein-membrane interactions. *Biochemistry* **45**, 14655-14664, (2006).
- 521 37 Botelho, S. C., Enquist, K., von Heijne, G. & Draheim, R. R. Differential repositioning of  
522 the second transmembrane helices from *E. coli* Tar and EnvZ upon moving the flanking  
523 aromatic residues. *Biochim Biophys Acta* **1848**, 615-621, (2015).
- 524 38 Hall, B. A., Armitage, J. P. & Sansom, M. S. Transmembrane helix dynamics of bacterial  
525 chemoreceptors supports a piston model of signalling. *PLoS computational biology* **7**,  
526 e1002204, (2011).
- 527 39 Mise, T. Structural Analysis of the Ligand-Binding Domain of the Aspartate Receptor Tar  
528 from *Escherichia coli*. *Biochemistry* **55**, 3708-3713, (2016).

- 529 40 *Norholm, M. H., von Heijne, G. & Draheim, R. R. Forcing the Issue: Aromatic Tuning*  
530 *Facilitates Stimulus-Independent Modulation of a Two-Component Signaling Circuit. ACS*  
531 *Synth Biol* **4**, 474-481, (2015).
- 532 41 *Batchelor, E. & Goulian, M. Robustness and the cycle of phosphorylation and*  
533 *dephosphorylation in a two-component regulatory system. Proc Natl Acad Sci U S A* **100**,  
534 691-696, (2003).
- 535 42 *Miyashiro, T. & Goulian, M. High stimulus unmasks positive feedback in an autoregulated*  
536 *bacterial signaling circuit. Proc Natl Acad Sci U S A* **105**, 17457-17462, (2008).
- 537 43 *Siryaporn, A. & Goulian, M. Cross-talk suppression between the CpxA-CpxR and EnvZ-*  
538 *OmpR two-component systems in E. coli. Mol Microbiol* **70**, 494-506, (2008).
- 539 44 *Chervitz, S. A. & Falke, J. J. Molecular mechanism of transmembrane signaling by the*  
540 *aspartate receptor: a model. Proc Natl Acad Sci U S A* **93**, 2545-2550, (1996).
- 541 45 *Falke, J. J. Piston versus Scissors: Chemotaxis Receptors versus Sensor His-Kinase*  
542 *Receptors in Two-Component Signaling Pathways. Structure* **22**, 1219-1220, (2014).
- 543 46 *Molnar, K. S. et al. Cys-Scanning Disulfide Crosslinking and Bayesian Modeling Probe the*  
544 *Transmembrane Signaling Mechanism of the Histidine Kinase, PhoQ. Structure* **22**, 1239-
- 545 1251, (2014).
- 546 47 *Cheung, J., Bingman, C. A., Reingold, M., Hendrickson, W. A. & Waldburger, C. D. Crystal*  
547 *structure of a functional dimer of the PhoQ sensor domain. J Biol Chem* **283**, 13762-13770,  
548 (2008).
- 549 48 *Inouye, M. Signaling by transmembrane proteins shifts gears. Cell* **126**, 829-831, (2006).
- 550 49 *Yusuf, R. & Draheim, R. R. Employing aromatic tuning to modulate output from two-*  
551 *component signaling circuits. J Biol Eng* **9**, 7, (2015).
- 552 50 *Casadaban, M. J. & Cohen, S. N. Analysis of gene control signals by DNA fusion and*  
553 *cloning in Escherichia coli. J Mol Biol* **138**, 179-207, (1980).
- 554 51 *Guyer, M. S., Reed, R. R., Steitz, J. A. & Low, K. B. Identification of a sex-factor-affinity site*  
555 *in E. coli as gamma delta. Cold Spring Harb Symp Quant Biol* **45 Pt 1**, 135-140, (1981).
- 556 52 *Batchelor, E., Silhavy, T. J. & Goulian, M. Continuous control in bacterial regulatory*  
557 *circuits. J Bacteriol* **186**, 7618-7625, (2004).
- 558 53 *Hsing, W. & Silhavy, T. J. Function of conserved histidine-243 in phosphatase activity of*  
559 *EnvZ, the sensor for porin osmoregulation in Escherichia coli. J Bacteriol* **179**, 3729-3735,  
560 (1997).
- 561 54 *Cantwell, B. J. et al. CheZ phosphatase localizes to chemoreceptor patches via CheA-short.*  
562 *J Bacteriol* **185**, 2354-2361, (2003).
- 563 55 *Southern, J. A., Young, D. F., Heaney, F., Baumgartner, W. K. & Randall, R. E.*  
564 *Identification of an epitope on the P and V proteins of simian virus 5 that distinguishes*  
565 *between two isolates with different biological characteristics. The Journal of general*  
566 *virology* **72 (Pt 7)**, 1551-1557, (1991).
- 567 56 *Lai, R. Z., Bormans, A. F., Draheim, R. R., Wright, G. A. & Manson, M. D. The region*  
568 *preceding the C-terminal NWETF pentapeptide modulates baseline activity and aspartate*  
569 *inhibition of Escherichia coli Tar. Biochemistry* **47**, 13287-13295, (2008).
- 570 57 *Lehning, C. E., Heidelberger, J. B., Reinhard, J., Norholm, M. H. & Draheim, R. R. A*  
571 *Modular High-Throughput In Vivo Screening Platform Based on Chimeric Bacterial*  
572 *Receptors. ACS Synth Biol*, (2017).
- 573 58 *Miller, J. H. A Short Course in Bacterial Genetics: A Laboratory Manual and Handbook for*  
574 *Escherichia coli and Related Bacteria. (Cold Spring Harbor Laboratory Press, 1992).*
- 575 59 *Ausubel, F. M. et al. Current Protocols in Molecular Biology. (Wiley, 1998).*
- 576 60 *Schneider, C. A., Rasband, W. S. & Eliceiri, K. W. NIH Image to ImageJ: 25 years of image*  
577 *analysis. Nat Methods* **9**, 671-675, (2012).

578 61 *Van Der Spoel, D. et al. GROMACS: fast, flexible, and free. Journal of computational*  
579 *chemistry* **26**, 1701-1718, (2005).  
580  
581



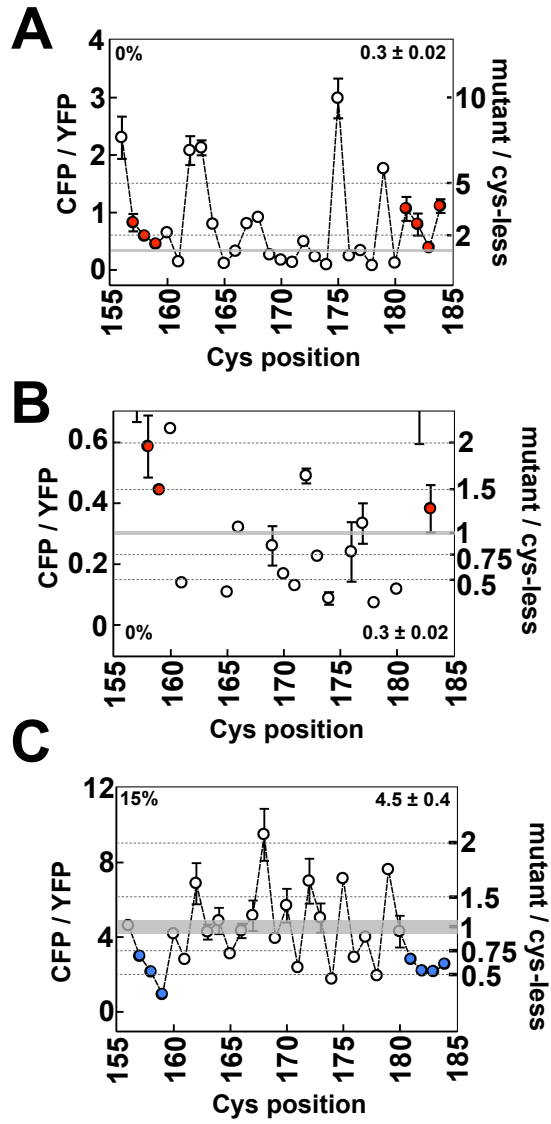

**Figure 2.**

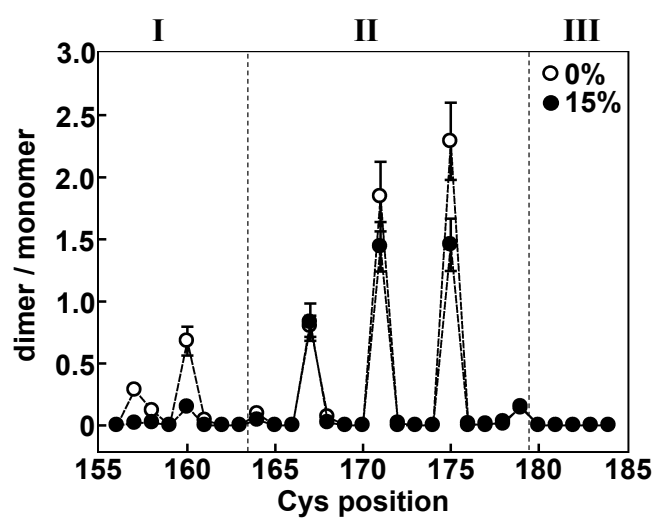

**Figure 3.**



**A**

EnvZ WLF-5: **I**M**L**L**W**L**F**A**I**G**G**A**I**R**I**Q**N**R  
 EnvZ WLF-4: **I**M**L**L**A****W**L**F**E**I**G**G**A**I**R**I**Q**N**R  
 EnvZ WLF-3: **I**M**L**L**A**I**W**L**F**E**G**G**A**I**R**I**Q**N**R**  
 EnvZ WLF-2: **I**M**L**L**A**I**G****W**L**F**E**A**I**R**I**Q**N**R**  
 EnvZ WLF-1: **I**M**L**L**A**I**G****W**L**F**A**I**R**I**Q**N**R  
 EnvZ WLF 0: **I**M**L**L**A**I**G****A****W**L**F**I**R**I**Q**N**R**  
 EnvZ WLF+1: **I**M**L**L**A**I**G****A****W**L**F**E**R**I**Q**N**R**  
 EnvZ WLF+2: **I**M**L**L**A**I**G****A****G****W**L**F**E**I**Q**N**R

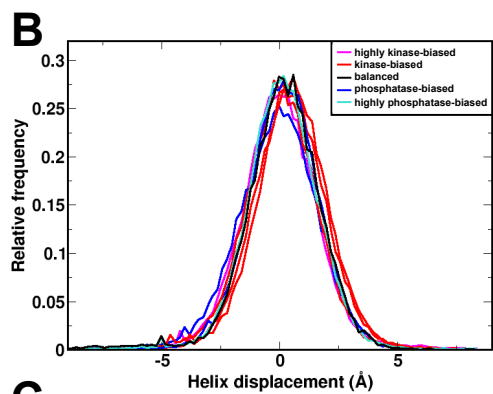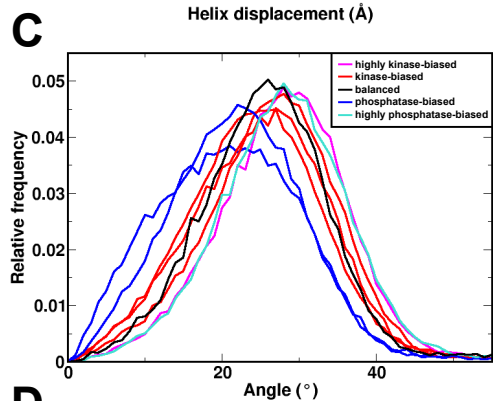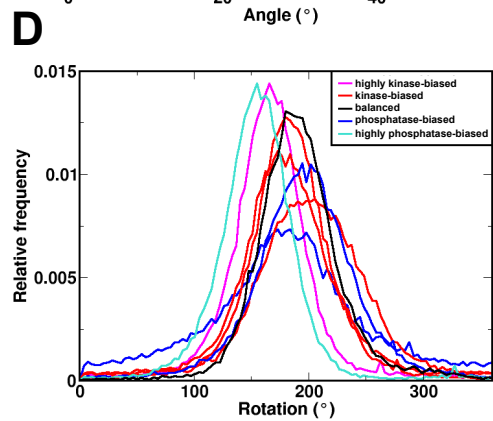

**Figure 4.**
